# Supplementary material for: Multifunctional optical sensing platform of temperature, pressure (vacuum) and laser power density: NaYF4: Gd3+, Yb3+, Er3+ nanomaterial as luminescent thermometer, manometer and power meter
Source: Royal Society of Chemistry journal article supplement (doi:10.1039/d3tc01712e), 2023-01-01
Supplement: d3tc01712e1.pdf [file d3tc01712e1.pdf]

## Supporting Information for:

**Multifunctional optical sensing platform of temperature, pressure (vacuum) and laser power density: NaYF<sub>4</sub>: Gd<sup>3+</sup>, Yb<sup>3+</sup>, Er<sup>3+</sup> nanomaterial as luminescent thermometer, manometer and power meter**

Christian Hernández-Álvarez<sup>1,\*</sup>, Gabriela Brito-Santos<sup>2</sup>, Inocencio R. Martín<sup>1</sup>, Joaquín Sanchiz<sup>1,2</sup>, Kamel Saidi<sup>3</sup>, Kevin Soler-Carracedo<sup>1</sup>, Łukasz Marciniak<sup>4</sup> and Marcin Runowski<sup>1,5,\*</sup>

<sup>1</sup>*Universidad de La Laguna, Departamento de Física, MALTA- Consolider Team, IMN and IUdEA Apdo. Correos 456, E-38206, San Cristóbal de La Laguna, Santa Cruz de Tenerife, Spain. E-mail: [chernaal@ull.edu.es](mailto:chernaal@ull.edu.es) (C.H.A) and [mrunowsk@ull.edu.es](mailto:mrunowsk@ull.edu.es) (M.R)*

<sup>2</sup>*Departamento de Química, Facultad de Ciencias, Apdo. Correos 456, E-38200, San Cristóbal de La Laguna, Santa Cruz de Tenerife, Spain.*

<sup>3</sup>*Laboratoire de Physique Appliquée, Groupe des Matériaux Luminescents, Faculté des Sciences de Sfax, Département de Physique, Université de Sfax, BP 1171 Sfax, Tunisia*

<sup>4</sup>*Institute of Low Temperature and Structure Research, Polish Academy of Sciences, Okólna 2, 50-422 Wrocław, Poland*

<sup>5</sup>*Adam Mickiewicz University, Faculty of Chemistry, Uniwersytetu Poznańskiego 8, 61-614 Poznań, Poland. E-mail: [runowski@amu.edu.pl](mailto:runowski@amu.edu.pl)*

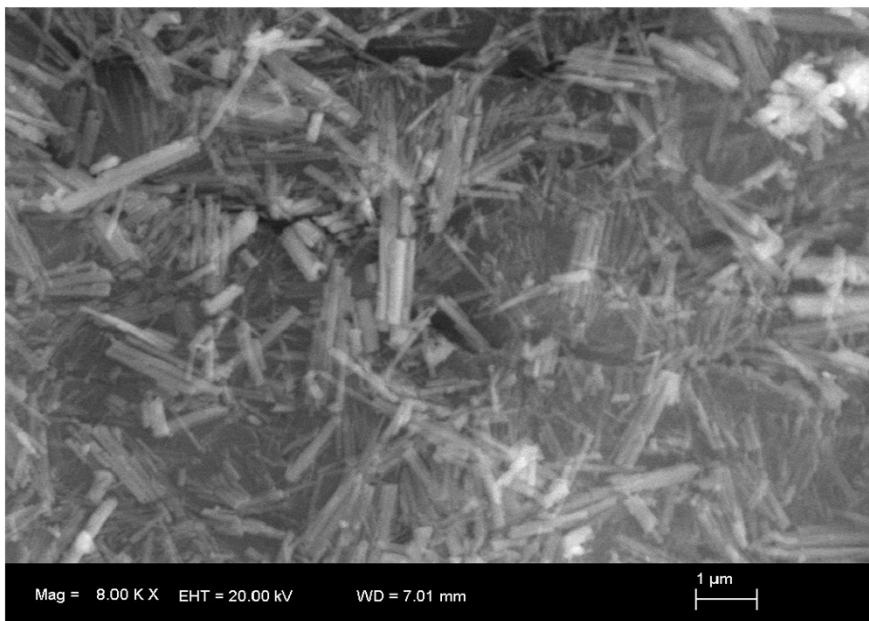

**Figure S1.** SEM images of NaYF<sub>4</sub>: Gd<sup>3+</sup>, Yb<sup>3+</sup>, Er<sup>3+</sup> nanoparticles crystallizing in rod-shape.

**Table S1.** Composition study for the elements in NaYF<sub>4</sub>: Gd, Yb, Er nanoparticles.

| Element | Line Type | Expected Atomic % | Found Atomic % |
|---------|-----------|-------------------|----------------|
| F       | K series  | 65.64             | 65.63          |
| Na      | K series  | 14.18             | 14.19          |
| Y       | L series  | 15.73             | 15.58          |
| Gd      | L series  | 2.02              | 2.04           |
| Er      | L series  | 0.41              | 0.48           |
| Yb      | L series  | 2.02              | 2.07           |
| Total:  |           | 100.00            | 100.00         |

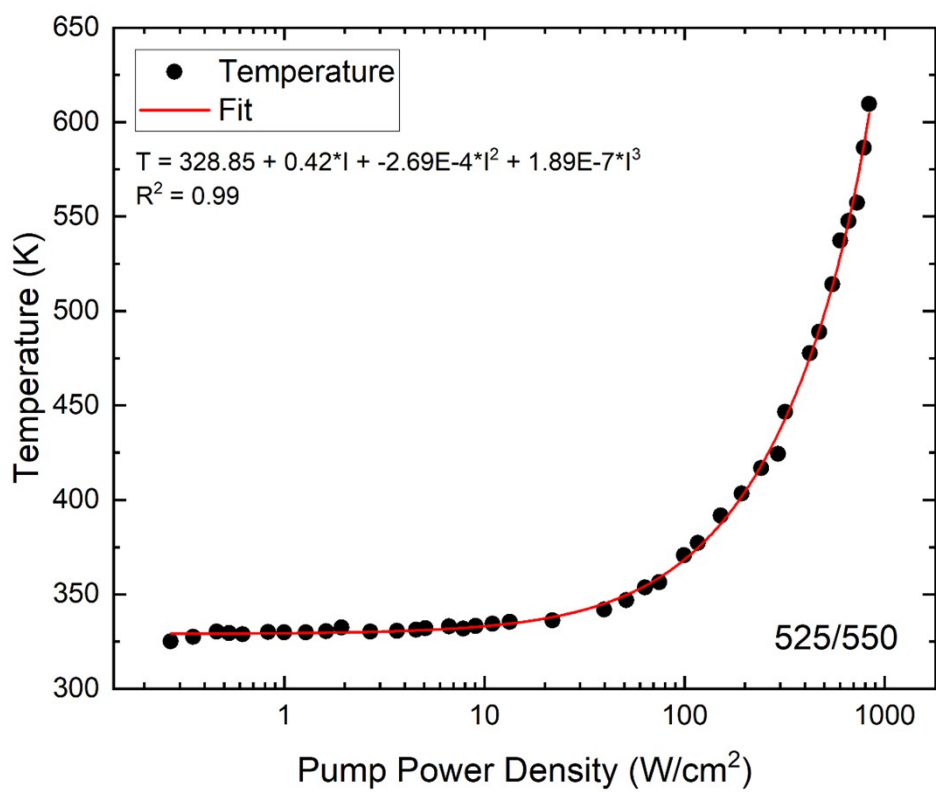

**Figure S2.** Relation between temperature and pump power density on the sample, obtained by the ratio between the LIR (525/550nm) and temperature.

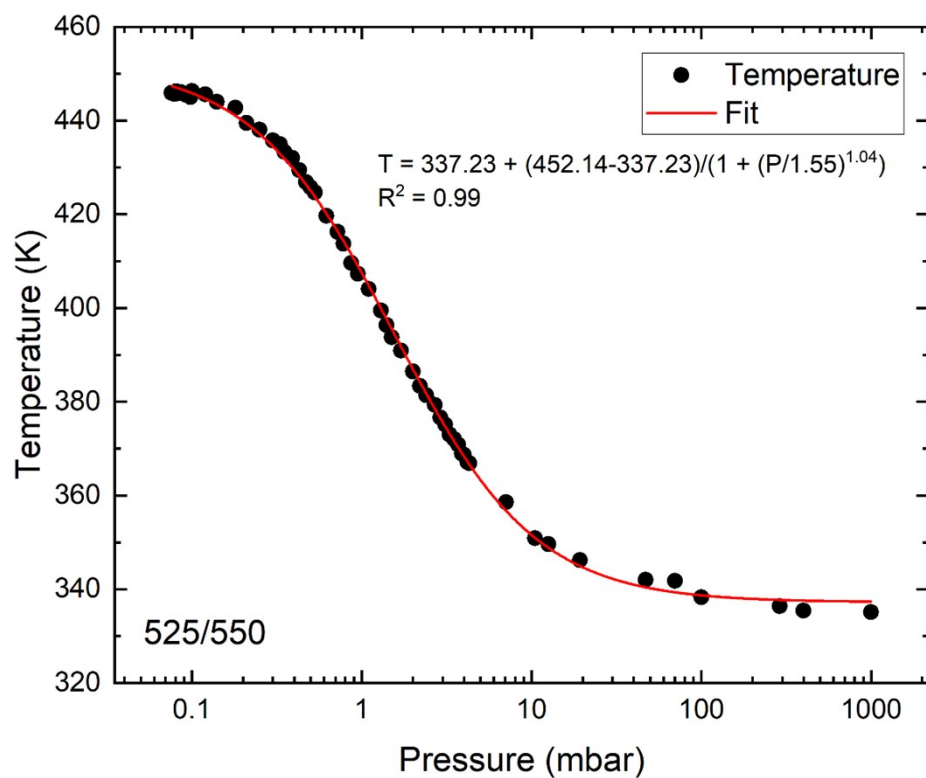

**Figure S3.** Relation between temperature and pressure on the sample, obtained by the ratio between the LIR (525/550nm) and temperature.
